# Supplementary material
Source: publisher figshare collection journal article supplement (https://tandf.figshare.com/ndownloader/files/28534277)
Supplement: Supplementary file 1 [file 28534277]

**Supplemental Information**

**Characterization of Thermal Decomposition of Oxygenated Organic Compounds in FIGAERO-CIMS**

Laura Hyesung Yanga, Masayuki Takeuchia, Yunle Chenb, and Nga Lee Nga,b,c*

aSchool of Civil and Environmental Engineering, Georgia Institute of Technology, Atlanta, Georgia, USA; bSchool of Earth and Atmospheric Sciences, Georgia Institute of Technology, Atlanta, Georgia, USA; c School of Chemical and Biomolecular Engineering, Georgia Institute of Technology, Atlanta, Georgia, USA

*Corresponding author (Nga Lee Ng, [ng@chbe.gatech.edu](mailto:ng@chbe.gatech.edu))

**Table S1.** Average Tmax from two measurements of each compound and its decomposition products at a normal ramping rate (13.3C min-1). For oxalic, malonic, succinic, meso-erythritol, levoglucosan, suberic, azelaic, sebacic, tridecanoic, dodecanedioic, palmitic, steric, and behenic acids, Tmax is an average of two to six measurements. For sucrose, only one measurement is available. Three compounds (decanoic, formic, and acetic acid) have likely evaporated at room temperature before Tmax measurement took place.

| **Compound** | **Description** | **Formula** | **Tmax (C)** |
| --- | --- | --- | --- |
| Xylitol | parent | C5H12O5 | 80 (3) |
| 1st dehydration | C5H10O4 | 179 (3) |
| Meso-Erythritol* | parent | C4H10O4 | 55 (3) |
| Mannitol | parent | C6H14O6 | 137 (4) |
| 1st dehydration | C6H12O5 | 181 (4) |
| Dodecanedioic acid* | parent | C12H22O4 | 60 (4) |
| Sebacic acid | parent | C10H18O4 | 66 (7) |
| Azelaic acid* | parent | C9H16O4 | 59 (6) |
| Suberic acid* | parent | C8H14O4 | 59 (3) |
| Succinic acid | parent | C4H6O4 | 46 (11) |
| Malonic acid | parent | C3H4O4 | 39 (11) |
| Oxalic acid | parent | C2H2O4 | 16 (9) |
| Behenic acid* | parent | C22H44O2 | 76 (2) |
| Stearic acid* | parent | C18H36O2 | 59 (2) |
| Palmitic acid* | parent | C16H32O2 | 50 (2) |
| Tridecanoic acid* | parent | C13H26O2 | 36 (5) |
| Decanoic acid | parent | C10H20O2 | N/A |
| Formic acid | parent | CH2O2 | N/A |
| Acetic acid | parent | C2 H4O2 | N/A |
| 5-Oxoazelaic acid | parent | C9H14O5 | 86 (2) |
| 1st dehydration | C9H12O4 | 178 (5) |
| 4-Oxoheptanedioic acid | parent | C7H10O5 | 88 (4) |
| 1st dehydration | C7H8O4 | 138 (9) |
| Sucrose | parent | C12H22O11 | 176 |
| Fragment | C6H10O5 | 188 |
| 1st dehydration of fragment | C6H8O4 | 189 |
| 2nd dehydration of fragment | C6H6O3 | 191 |
| 1,3-Acetonedicarboxylic acid | parent | C5H6O5 | 72 (4) |
| 1st dehydration | C5H4O4 | 172 (6) |
| 1st decarboxylation | C4H6O3 | 79 (2) |
| Oxaloacetic acid | parent | C4H4O5 | 62 (4) |
| 1st decarboxylation | C3H4O3 | 69 (8) |
| Citric acid | parent | C6H8O7 | 111 (4) |
| 1st dehydration | C6H6O6 | 135 (2) |
| 2nd dehydration | C6H4O5 | 154 (7) |
| decarboxylation of the 1st dehydration | C5H6O4 | 163 (7) |
| Malic acid | parent | C4H6O5 | 75 (2) |
| 1st dehydration | C4H4O4 | 179 (2) |
| Tartaric acid | parent | C4H6O6 | 85 (6) |
| 1st dehydration | C4H4O5 | 186 (6) |
| 1,3,5-Cyclohexanetricarboxylic acid | parent | C9H12O6 | 120 (4) |
| 1st dehydration | C9H10O5 | 188 (4) |
| Benzene-1,3,5-tricarboxylic acid | parent | C9H6O6 | 141 (0) |
| 1st decarboxylation | C8H6O4 | 147 (15) |
| 1,2,3,4-Butanecarboxylic acid | parent | C8H10O8 | 147 (8) |
| 1st dehydration | C8H8O7 | 154 (10) |
| 2nd dehydration | C8H6O6 | 161 (9) |
| Tricarballylic acid | parent | C6H8O6 | 103 (2) |
| 1st dehydration | C6H6O5 | 155 (12) |

** The amount of compound deposited onto the filter is 2-20 ng.*

**Table S2.** True molecular formula (MF) vs. measured molecular formula (MF) of standards tested in this study. The bias (%) is defined as the measured value minus true value divided by true value and is calculated for O:C ratio, H:C ratio, and OSC.

| **Type** | **Compound** | **True MF** | **Measured MF** | **Bias (%)** | | |
| --- | --- | --- | --- | --- | --- | --- |
| **O:C** | **H:C** | **OSC** |
| Alcohol | Xylitol | C5H12O5 | C5H11.97O4.98 | -0.4 | -0.2 | 0.5 |
| Meso-Erythritol | C4H10O4 | C4H10O4 | 0 | 0 | 0 |
| Mannitol | C6H14O6 | C6H13.96O5.98 | -0.3 | -0.3 | 0 |
| Monoacid | Behenic acid | C22H44O2 | C22H44O2 | 0 | 0 | 0 |
| Stearic acid | C18H36O2 | C18H36O2 | 0 | 0 | 0 |
| Palmitic acid | C16H32O2 | C16H32O2 | 0 | 0 | 0 |
| Tridecanoic acid | C13H26O2 | C13H26O2 | 0 | 0 | 0 |
| Decanoic acid | C10H20O2 | C10H20O2 | 0 | 0 | 0 |
| Formic acid | CH2O2 | CH2O2 | 0 | 0 | 0 |
| Acetic acid | C2H4O2 | C2H4O2 | 0 | 0 | 0 |
| Diacid | Dodecanedioic acid | C12H22O4 | C12H22O4 | 0 | 0 | 0 |
| Sebacic acid | C10H18O4 | C10H18O4 | 0 | 0 | 0 |
| Azelaic acid | C9H16O4 | C9H16O4 | 0 | 0 | 0 |
| Suberic acid | C8H14O4 | C8H14O4 | 0 | 0 | 0 |
| Succinic acid | C4H6O4 | C4H6O4 | 0 | 0 | 0 |
| Malonic acid | C3H4O4 | C3H4O4 | 0 | 0 | 0 |
| Oxalic acid | C2H2O4 | C2H2O4 | 0 | 0 | 0 |
| Polyacid | 1,3,5-Cyclohexanetricarboxylic acid | C9H12O6 | C9H11.96O5.98 | -0.3 | -0.3 | - |
| Benzene-1,3,5-tricarboxylic acid | C9H6O6 | C8.98H6O5.96 | -0.4 | 0.2 | -1.1 |
| 1,2,3,4-Butanecarboxylic acid | C8H10O8 | C7.70H7.53O6.66 | -13.5 | -21.8 | 0.3 |
| Tricarballylic acid | C6H8O6 | C6H6.81O5.41 | -9.8 | -14.9 | 0.3 |
| Multifunctional | 5-Oxoazelaic acid | C9H14O5 | C9H13.98O4.99 | -0.2 | -0.1 | 0.0 |
| 4-Oxoheptanedioic acid | C7H10O5 | C7H9.95O4.97 | -0.6 | -0.5 | - |
| Sucrose | C12H22O11 | C4.19H7.29O3.56 | -6.6 | -4.4 | - |
| 1,3-Acetonedicarboxylic acid | C5H6O5 | C4.49H6O3.98 | -11.4 | 11.4 | -45.4 |
| Oxaloacetic acid | C4H4O5 | C3.92H4O4.84 | -1.2 | 2.0 | -3.4 |
| Citric acid | C6H8O7 | C5.77H6.75O6.18 | -8.2 | -12.3 | -2.8 |
| Malic acid | C4H6O5 | C4H5.76O4.88 | -2.4 | -4.0 | 0 |
| Tartaric acid | C4H6O6 | C4H5.93O5.96 | -0.7 | -1.2 | -0.2 |

**Table S3.** A comparison of integrated signals (unit: counts) of citric acid (C6H8O7) and thermal decomposition products (C6H6O6, C6H4O5, C5H6O4) computed at different ramping rates. The values are averages of two runs except for the fastest rate which is an average of three runs.

| **Ramping Rate**  **C min-1)** | **C6H8O7**  **counts** | **C6H6O6**  **counts** | **C6H4O5**  **counts** | **C5H6O4**  **counts** |
| --- | --- | --- | --- | --- |
| 3.3 | 2,595,210 (256,000) | 3,052,633  (904,112) | 66,520  (60,500) | - |
| 13.3 | 2,675,188 (353,926) | 2,292,683  (173,879) | 199,126 (28,480) | 133,134  (24,850) |
| 40 | 2,886,287  (194,172) | 2,706,429  (399,140) | 200,932 (65,467) | 100,474  (77,468) |


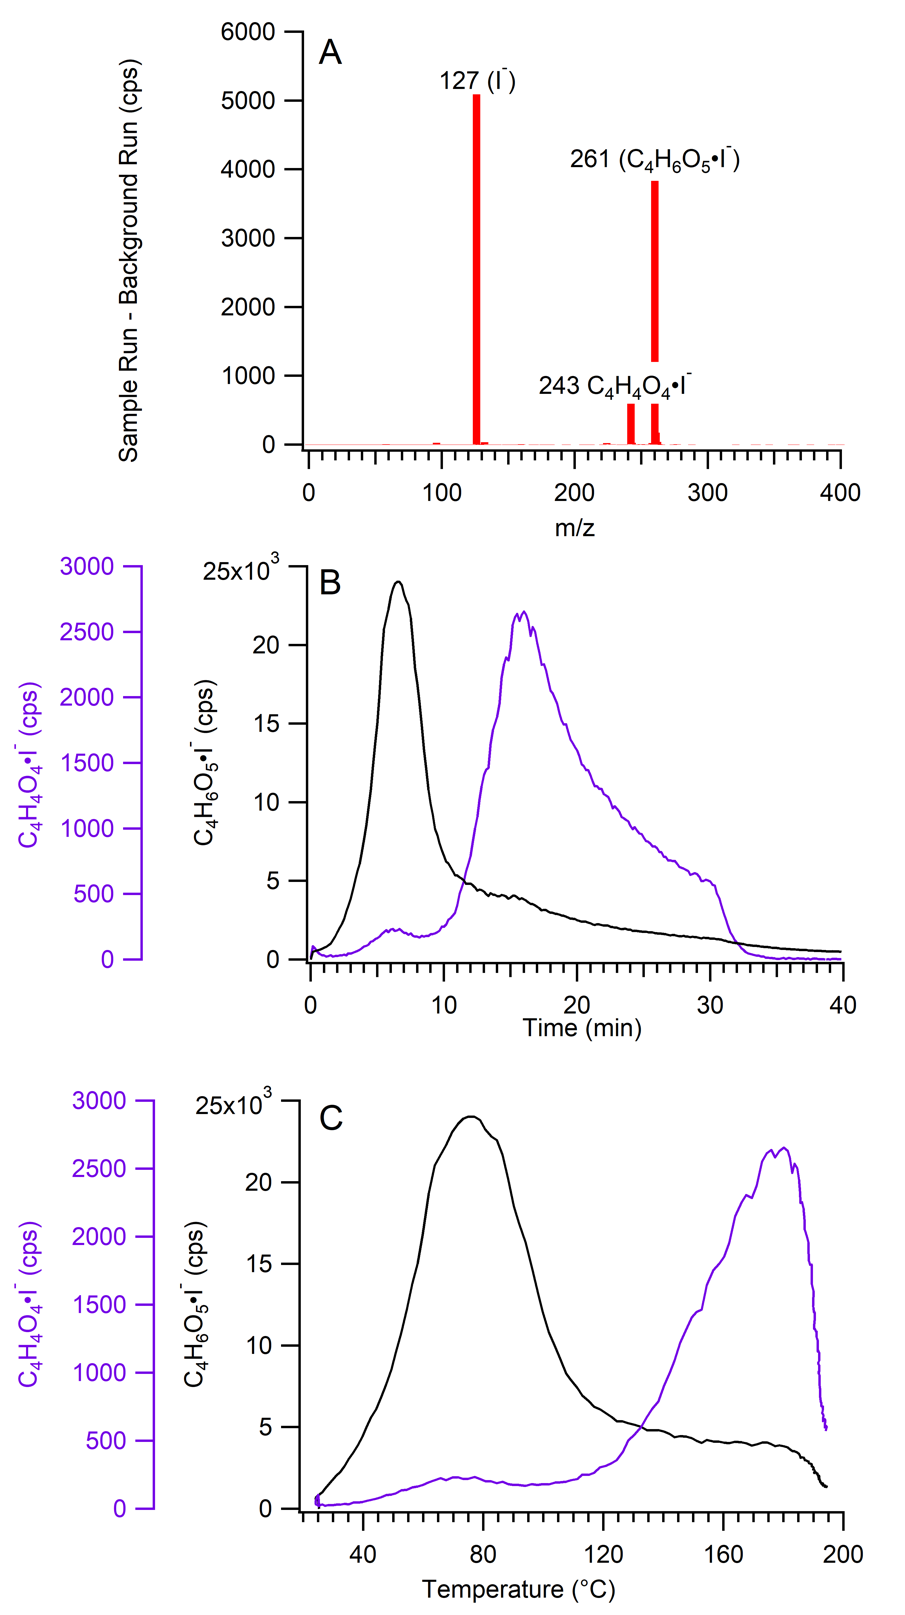


**Figure S1**. A) Mass spectrum of malic acid, B) Signal (cps) of malic acid iodide adduct and maleic acid iodide adduct (C4H4O4I-) vs. time (min), and C) Signal (cps) of these compounds vs. temperature (C).

**
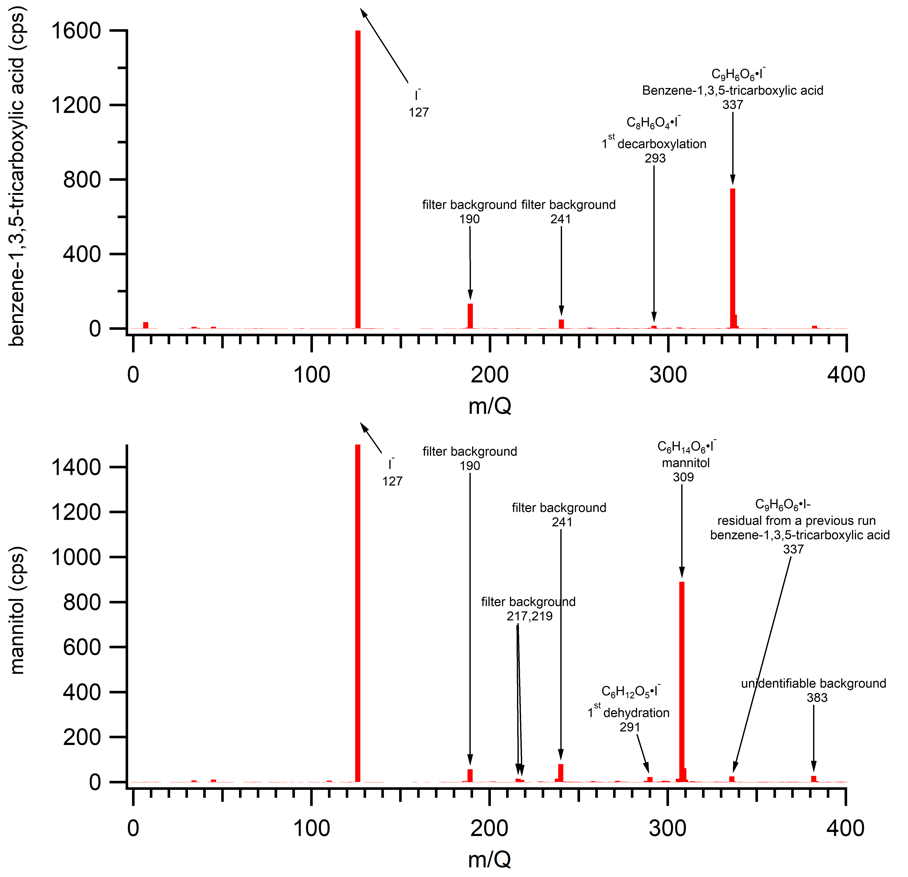

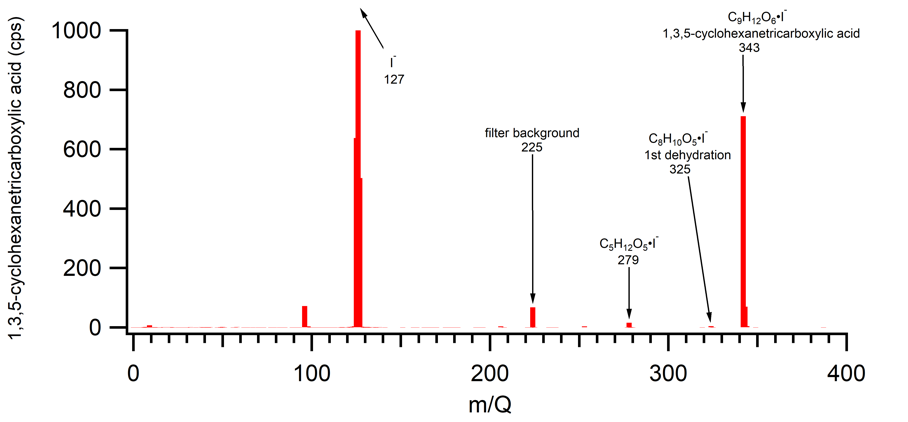

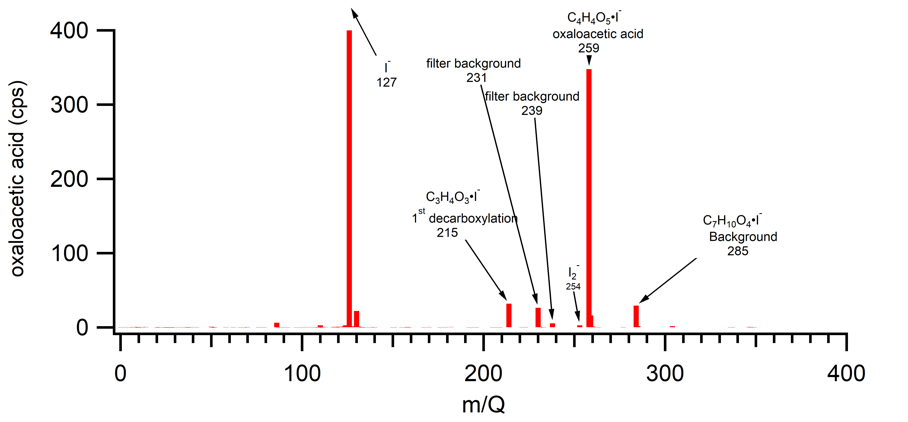
Figure S2**. Stick mass spectra of 4 compounds (benzene-1,3,5-tricarboxylic acid, mannitol, 1,3,5-cyclohexanetricarboxylic acid, and oxaloacetic acid) with a fraction of the summed signal of thermal decomposition products and parental compound to the total detected signal between 86-91%. As shown in the stick figure, 6-14% of their signals were filter background, unidentifiable background, or residual from a previous run.


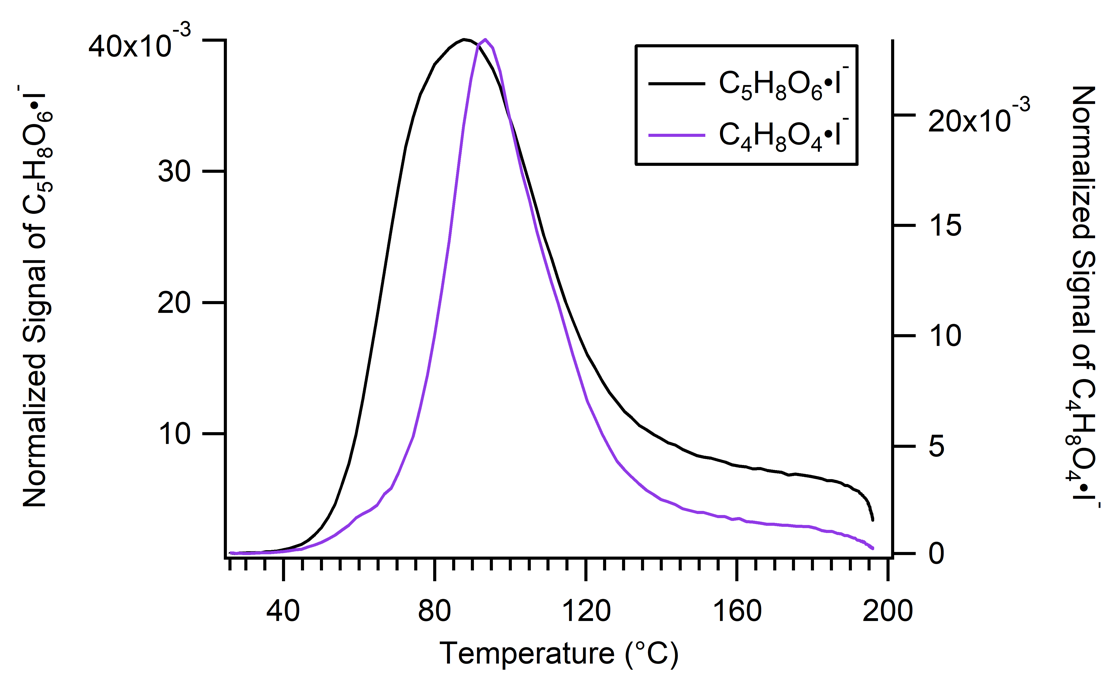


**Figure S3**. Thermograms of an example parental compound from Yorkville, GA field data undergoing thermal decomposition and its decarboxylation product. The parental compound (C5H8O6) is investigated for an evidence of thermal decomposition as it meets the screening criteria (2 DBE 4, Tmax  72 C, and nO > 4) offered by this work. Indeed, its decarboxylation product (C4H8O4) which is also present in the field data is an artifact of thermal decomposition as it has a higher Tmax than the parental compound. It should be noted that the signal from Yorkville, GA is campaign-averaged and is normalized to the peak signal value.

**Sample Calculation of the Measured Number of Elements**

Below is an example calculation used to obtain the measured number of elements for compounds that only undergo primary decarboxylation and dehydration, thus exhibiting dominant signals from the parental, decarboxylation, and dehydration products. Assume a parental compound (original standard compound) has a formula of , where x is the number of carbon atom, y is the number of the hydrogen atom, and z is the number of the oxygen atom. The MF of the first dehydration product becomes , whereas the MF of the first decarboxylation product becomes . Then the measured numbers of carbon (), hydrogen (), and oxygen () elements can be calculated using the following equations (S1, S2, and S3):

(S1)

(S2)

(S3)

where , , and denote the fraction of parental compound, primary dehydration product, and primary decarboxylation product computed from equation 1, respectively. Once the measured numbers of elements are calculated, the measured MF can be constructed and be compared to the original parental MF. It should be noted that this example calculation pertains to only primary decomposed products with three major compounds, but a similar method is employed if a product decomposes further into secondary products. For the three compounds (1,2,3,4-butanetetracarboxylic acid, citric acid, and sucrose) that contain significant portions of other products than the major three products, decomposed products categorized under “other” were taken into an account in the calculation of the measured number of elements.
